# Supplementary material for: Enhanced Levels of Glycosphingolipid GM3 Delay the Progression of Diabetic Nephropathy
Source: MDPI journal article supplement (doi:10.3390/ijms241411355), 2023-07-12
Supplement: s1 [file s1]

**Supplementary Table S1** Reagents, Antibodies used in this study

| Name                                  | Source                            | Type               |
|---------------------------------------|-----------------------------------|--------------------|
| Streptozotocin                        | FUJIFILM Wako, #195-15154         | powder             |
| Valproic acid sodium salt             | FUJIFILM Wako, #193-18352         | powder             |
| anti-Insulin                          | Invitrogen, #14-9769-82           | Mouse, monoclonal  |
| anti-p57 (H-91)                       | Santa Cruz Biotech, #sc-8298      | Rabbit, polyclonal |
| anti-PDGFR- $\beta$ (28E1)            | Cell Signaling Tech, #3169        | Rabbit, monoclonal |
| anti-SGLT2                            | abcam, #ab85626                   | Rabbit, polyclonal |
| anti-Nephrin C-terminus               | Original [1]                      | Mouse, polyclonal  |
| Anti-GM3 (GMR6)                       | Tokyo chemical Industry, #A2582   | Mouse, monoclonal  |
| Alexa Fluor 488-Rabbit anti-Mouse IgG | Thermo Fisher Scientific, #A27023 | Rabbit, polyclonal |
| Alexa Fluor 568-Goat anti-Mouse IgM   | Life Technologies, #A-21043       | Goat, polyclonal   |

**Reference**

1. Kawashima, N.; Naito, S.; Hanamatsu, H.; Nagane, M.; Takeuchi, Y.; Furukawa, J. I.; Iwasaki, N.; Yamashita, T.; Nakayama, K. I., Glycosphingolipid GM3 prevents albuminuria and podocytopathy induced by anti-nephrin antibody. *Sci Rep* **2022**, 12, (1), 16058. DOI: 10.1038/s41598-022-20265-w
